# Supplementary material
Source: PubMed Central journal article supplement (PMC6251718)
Supplement: NIHMS938942-supplement-Supplemental.pdf [file NIHMS938942-supplement-Supplemental.pdf]

## Supporting Information

### **Biochemometrics to Identify Synergists and Additives from Botanical Medicines: A Case Study with *Hydrastis canadensis***

Emily R. Britton,<sup>†</sup> Joshua J. Kellogg,<sup>†</sup> Olav M. Kvalheim,<sup>‡</sup> Naja B. Cech<sup>\*†</sup>

<sup>†</sup> Department of Chemistry & Biochemistry, University of North Carolina Greensboro, Greensboro NC United States

<sup>‡</sup> Department of Chemistry, University of Bergen, Bergen Norway

\*corresponding author, email: [naja\\_cech@uncg.edu](mailto:naja_cech@uncg.edu), voice 336-324-5011, fax 336-334-5402

## CONTENTS

**Figure S1.** Fractionation Scheme

**Figure S2.** MIC curves for the 3 stages of fractionation

**Figure S3.**  $^1\text{H}$  NMR spectra of 3,3'-dihydroxy-5,7,4'-trimethoxy-6,8-C-dimethyl-flavone (**29**).

**Figure S4.**  $^{13}\text{C}$  NMR spectra of **29**.

**Figure S5.** HSQC NMR spectra of **29**.

**Figure S6.** HMBC NMR spectra of **29**.

**Figure S7.** COSY NMR spectra of **29**.

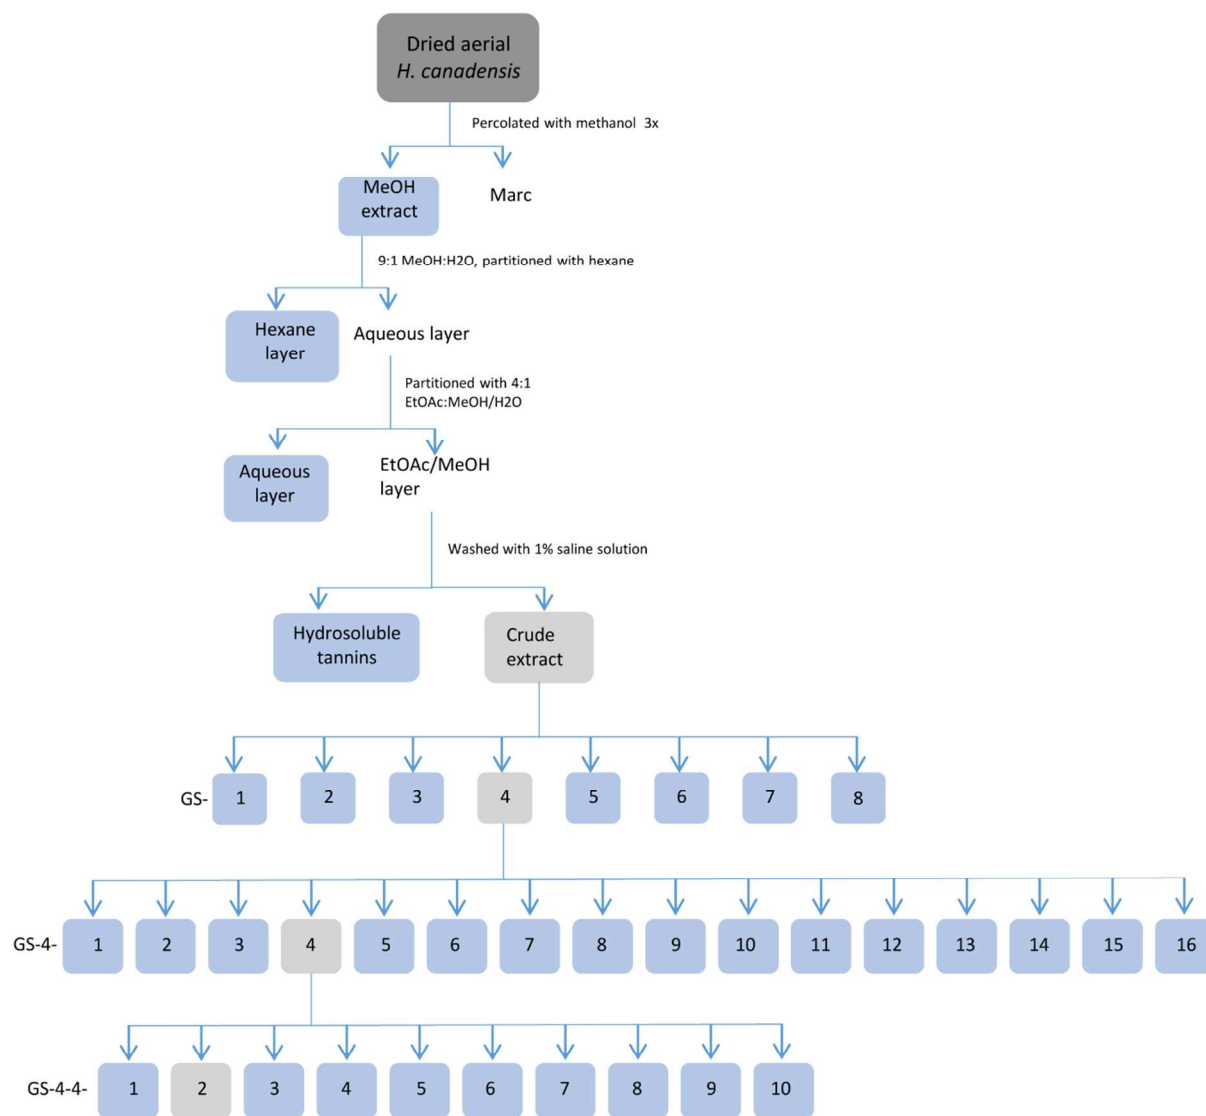

**Figure S1.** Fractionation scheme.

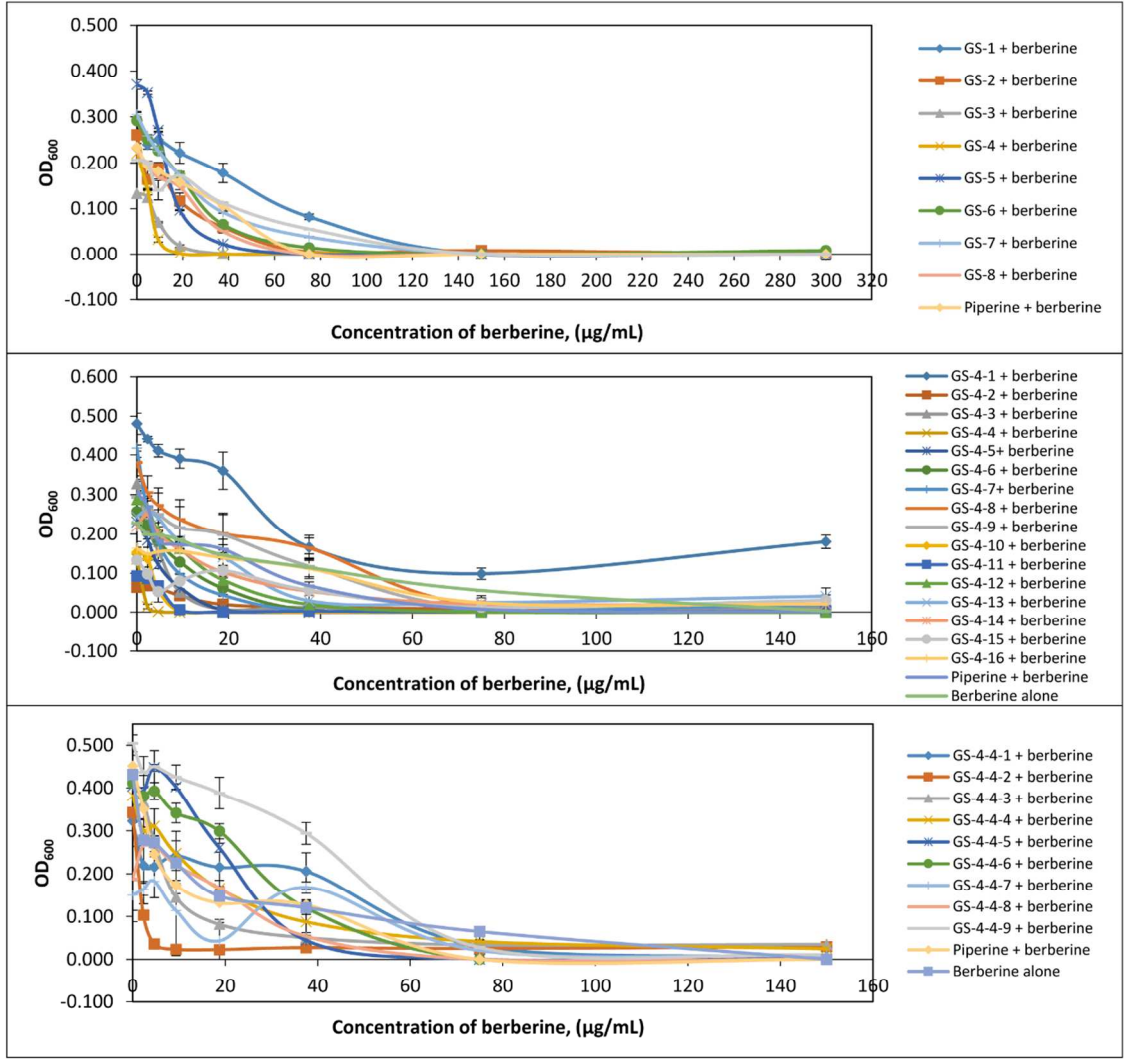

**Figure S2.** Minimum inhibitory concentration (MIC) curves for berberine in combination with a constant concentration of fraction (75 µg/mL). Each point represents the average OD<sub>600</sub> of three wells with identical treatments, and error bars represent standard error of those measurements.

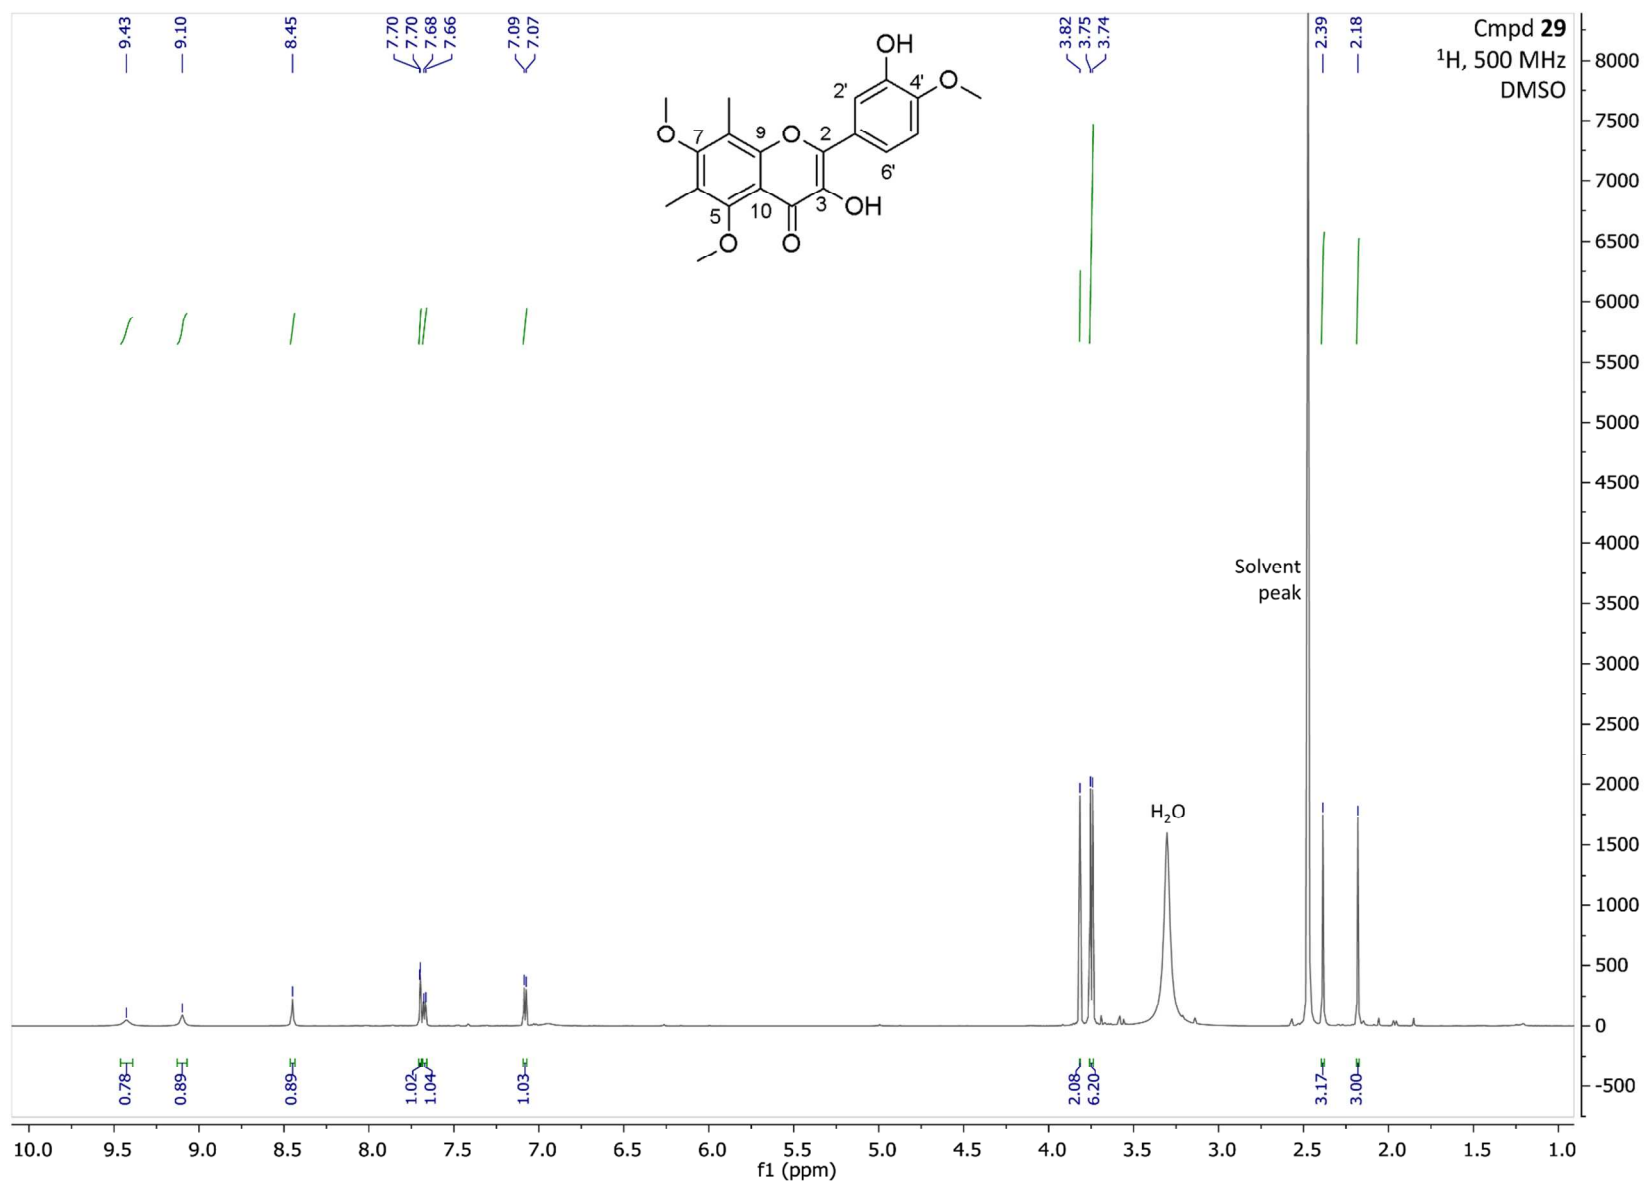

**Figure S3.** <sup>1</sup>H NMR (DMSO, 500 MHz) spectrum of 3,3'-dihydroxy-5,7,4'-trimethoxy-6,8-C-dimethyl-flavone (**29**).

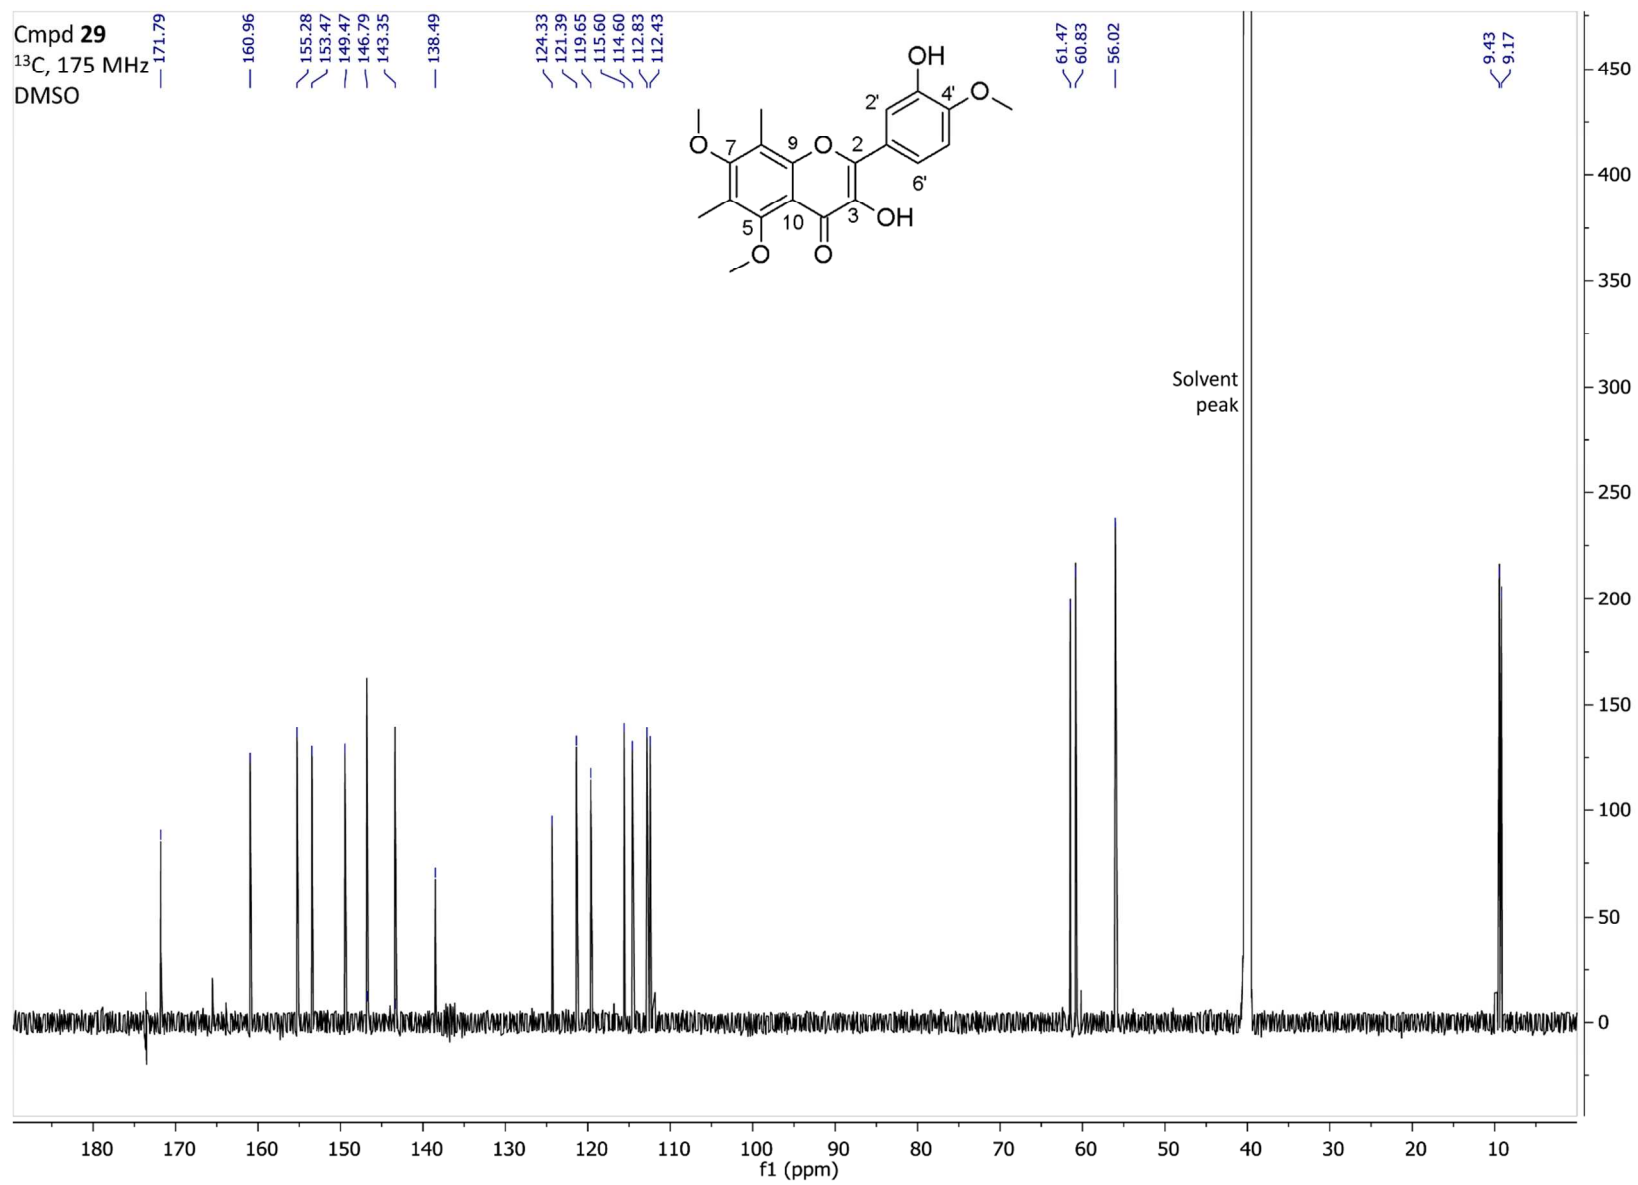

Figure S4.  $^{13}\text{C}$  NMR spectrum (DMSO 175 MHz) of **29**.

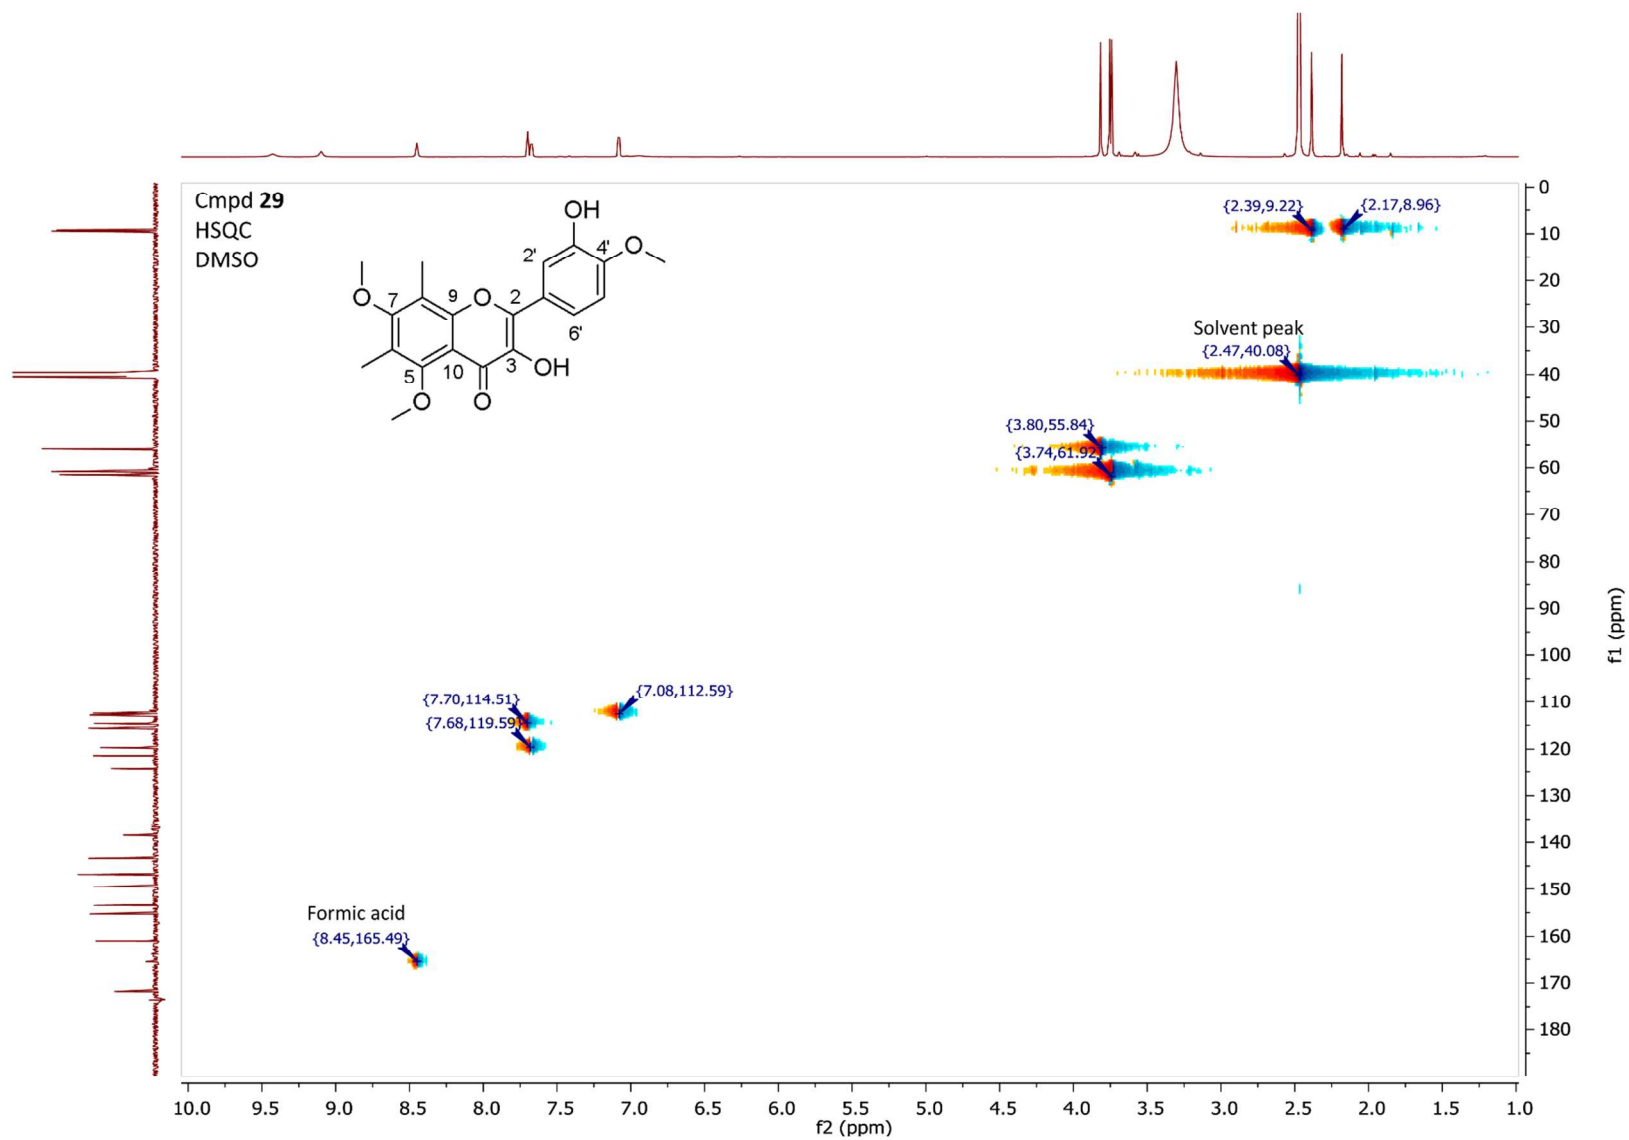

Figure S5. HSQC NMR spectrum of 29.

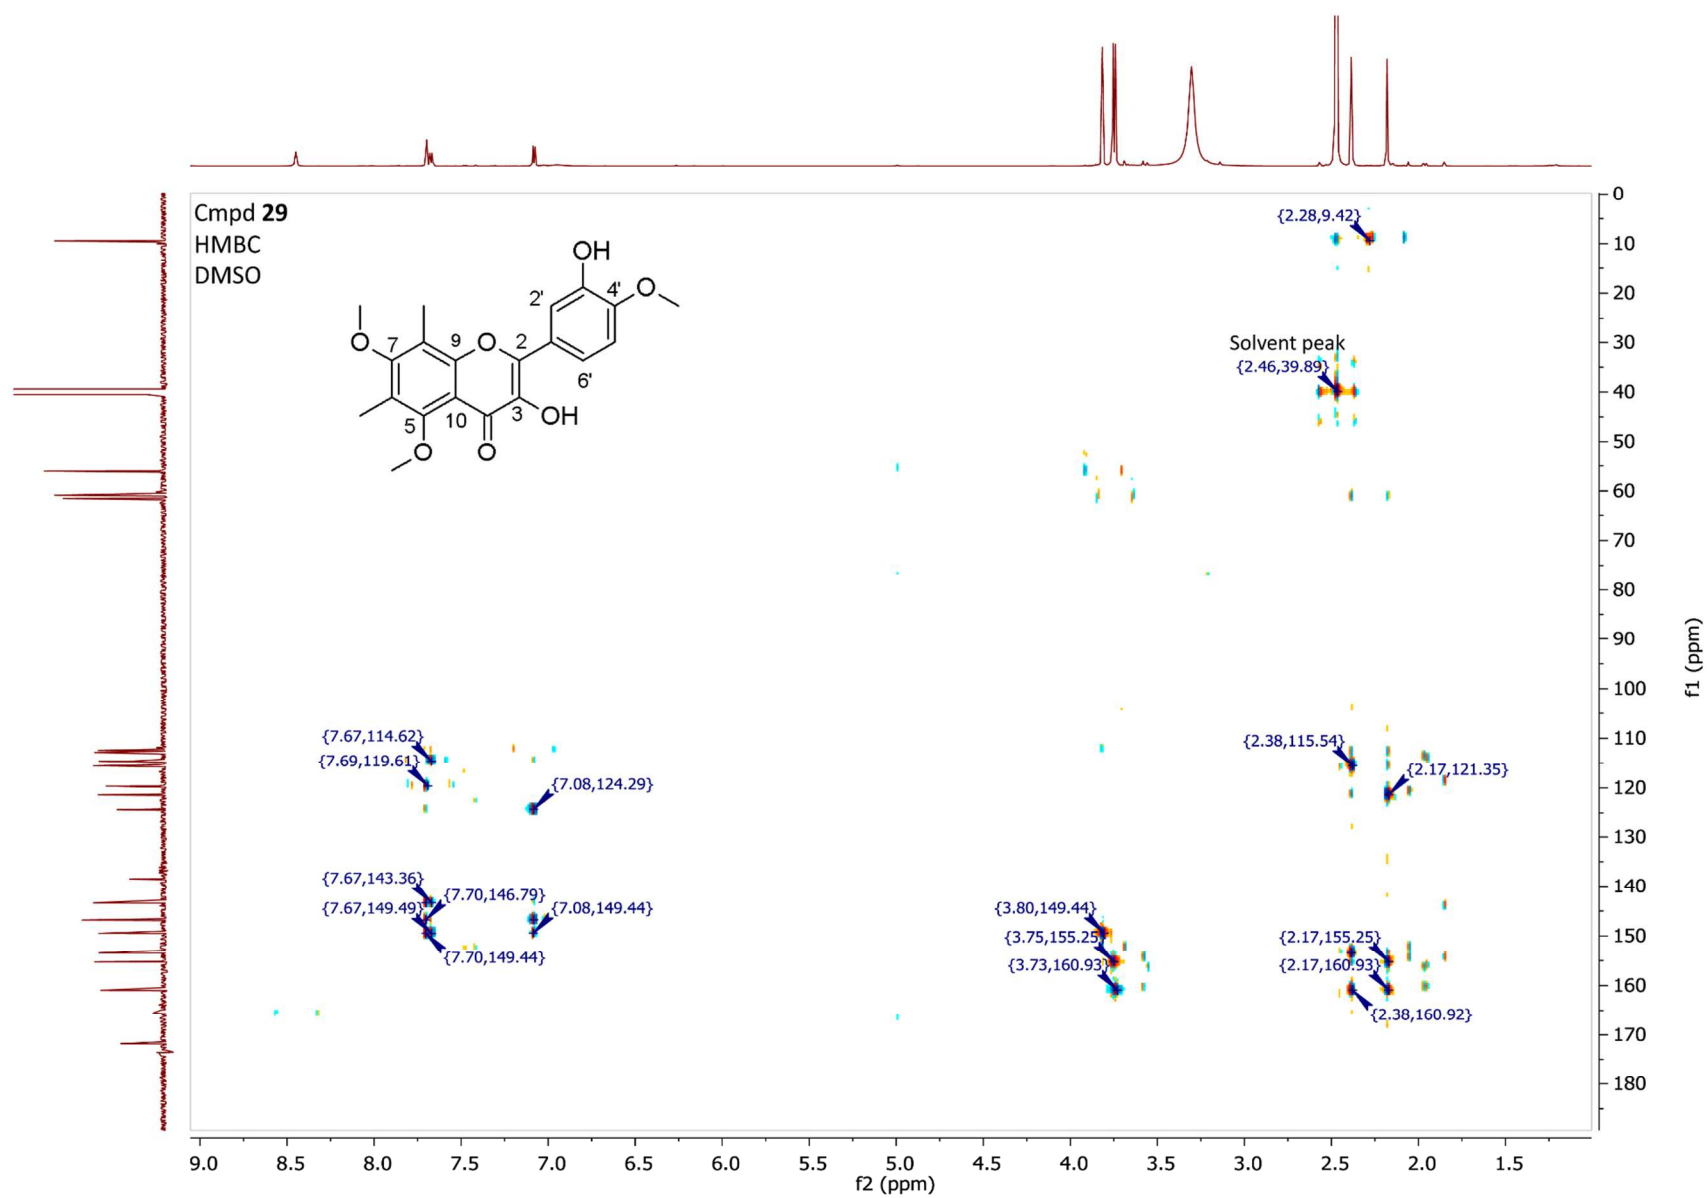

Figure S6. HMBC NMR spectrum of 29.



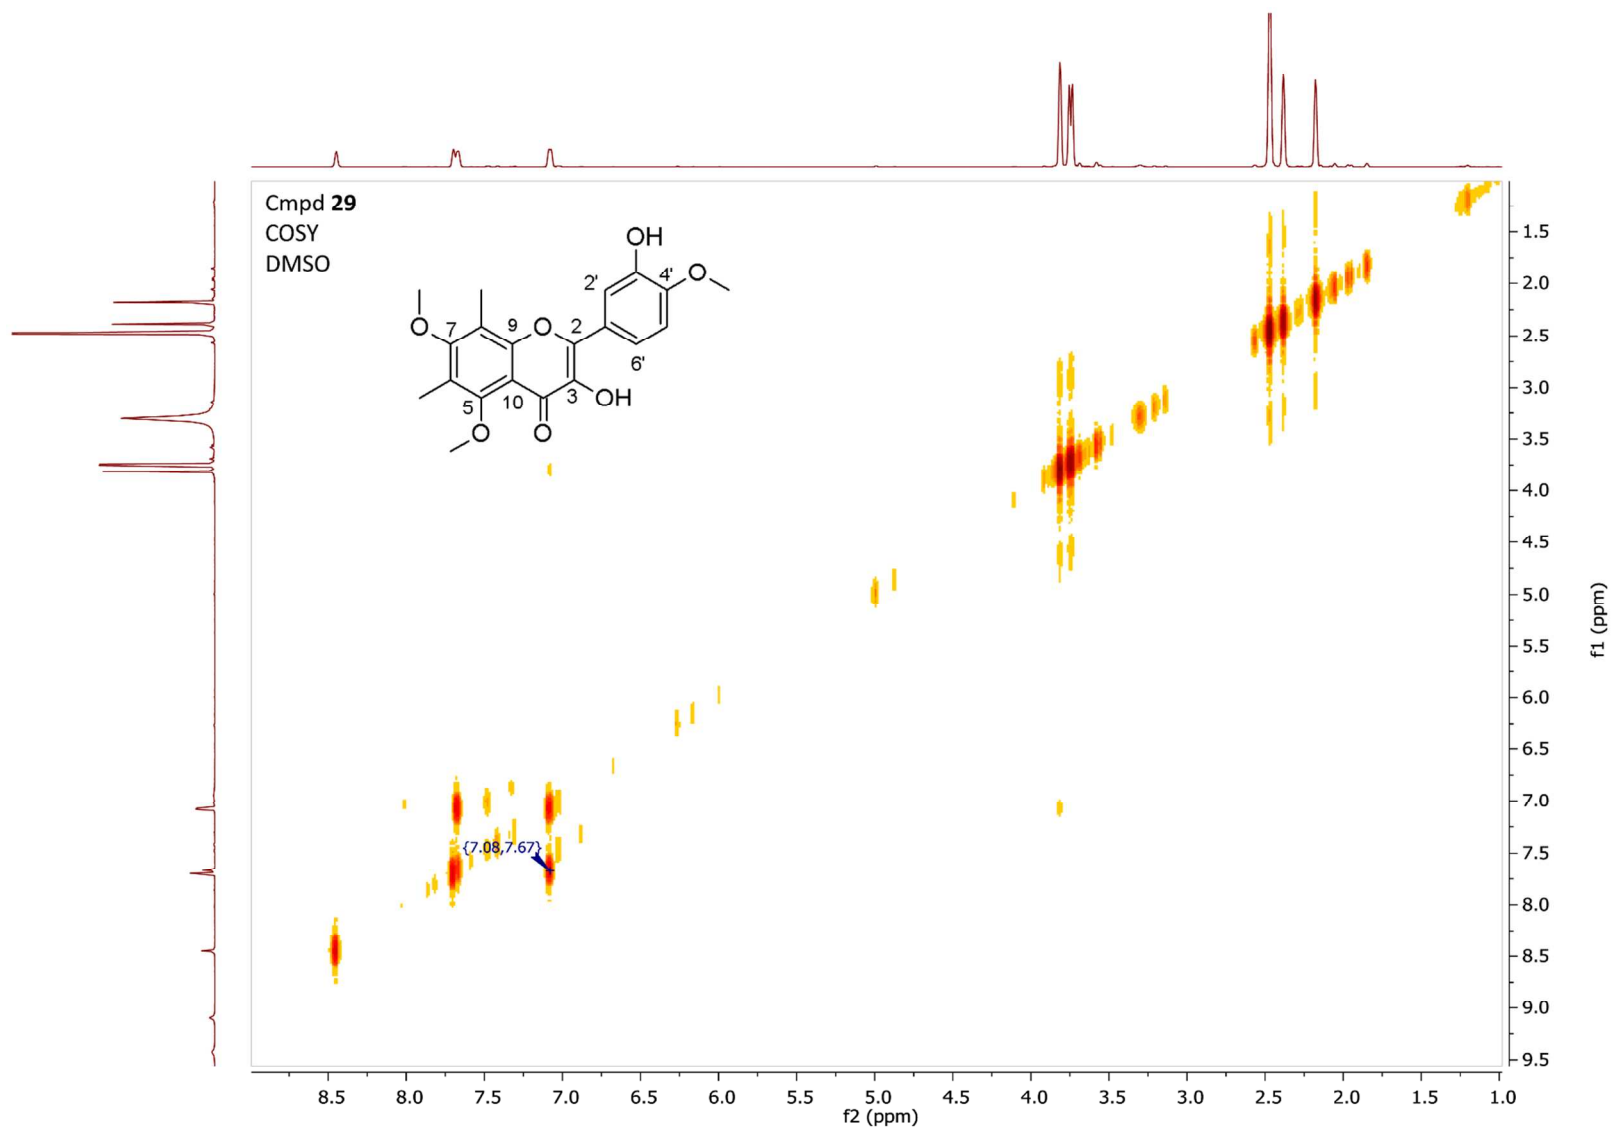

Figure S7. COSY NMR spectrum of **29**.
